# Supplementary figures and images for: Estimation of Linkage Disequilibrium and Effective Population Size in Three Italian Autochthonous Beef Breeds
Source: MDPI journal article supplement (doi:10.3390/ani10061034), 2020-06-14

CAL

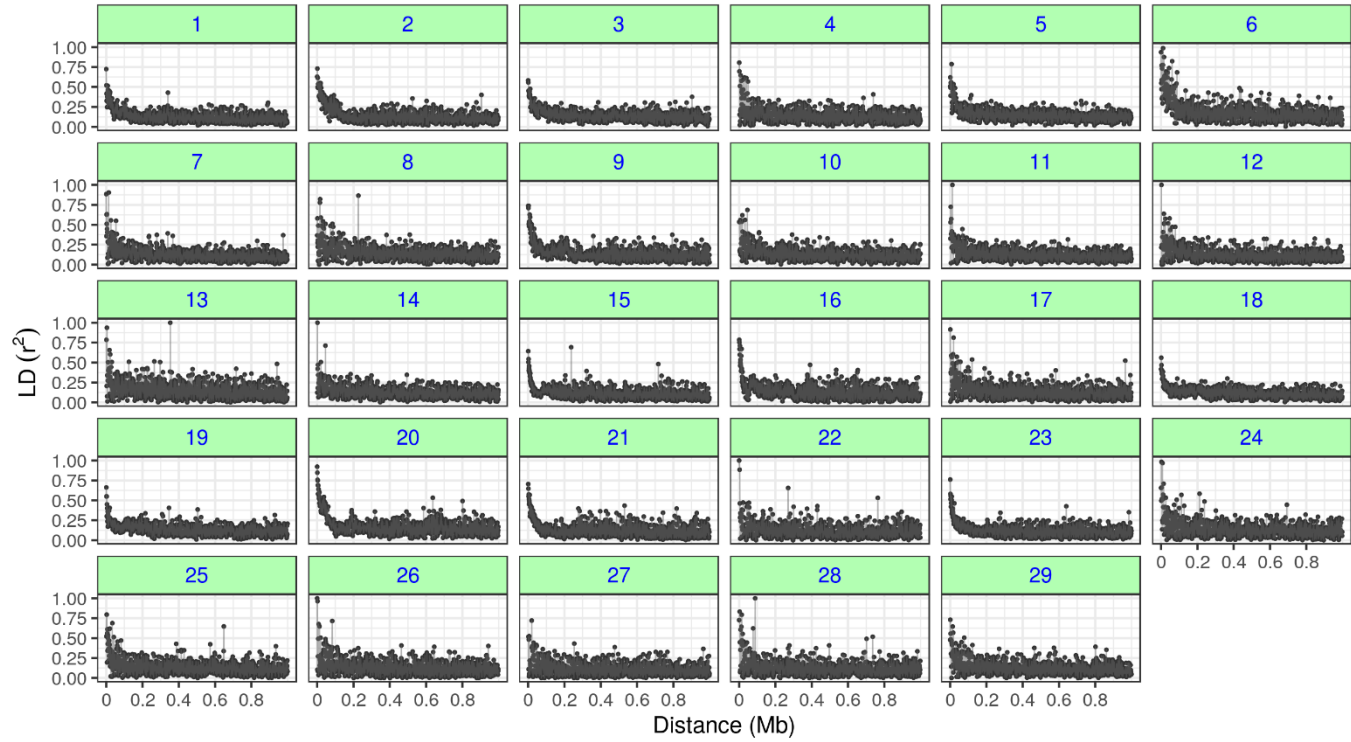

MUP

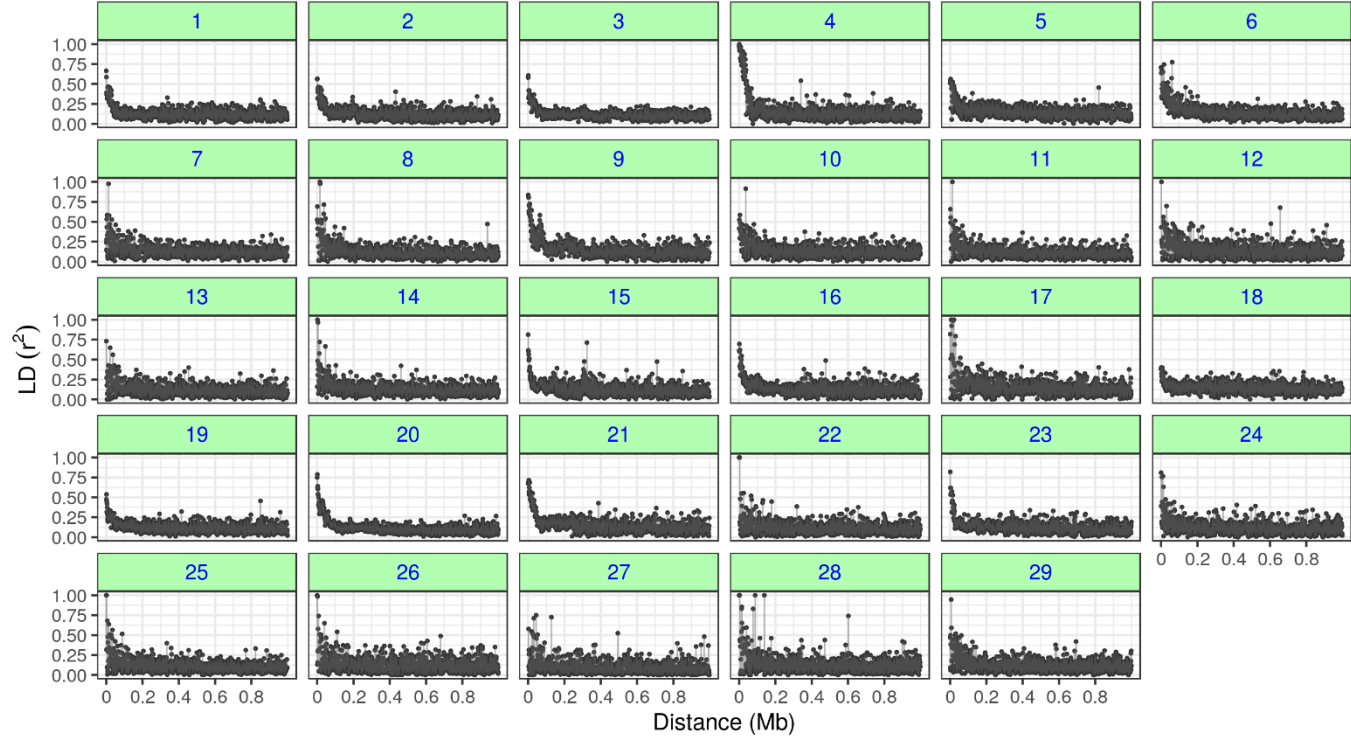

PON

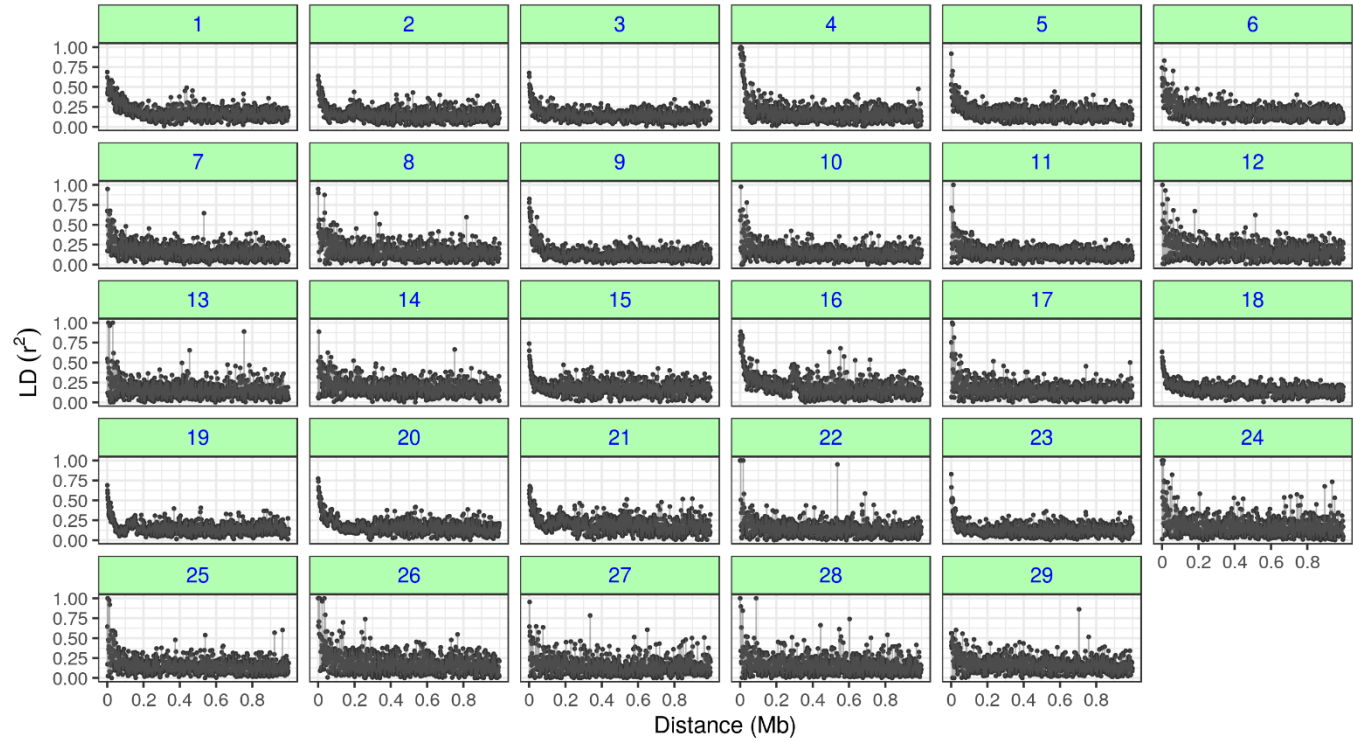

LIM

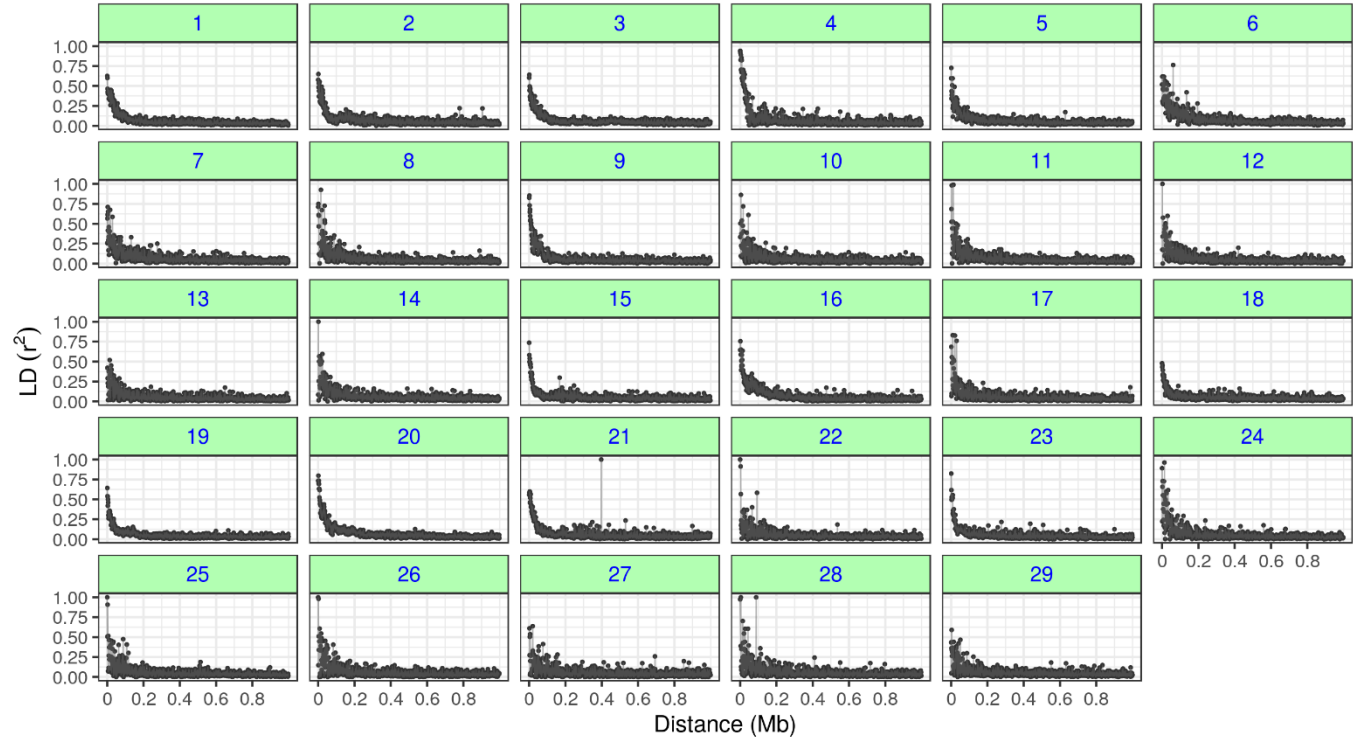

Supplement: s1 [file s1]
